# Supplementary material for: Combination of laser and human adipose-derived stem cells in repair of rabbit anal sphincter injury: a new therapeutic approach
Source: PubMed Central journal article supplement (PMC6889595; doi:10.1186/s13287-019-1477-5), 2019-12-02
Supplement: 13287_2019_1477_MOESM1_ESM.pdf [file 13287_2019_1477_MOESM1_ESM.pdf]

Supplement table 1: Primer sequences for real time PCR

| <b>Primer name</b>     | <b>Sequence 5'→3'</b> |
|------------------------|-----------------------|
| <b><i>ACTA1</i></b>    |                       |
| Forward                | GATGAAGGAGGGCTGGAAGA  |
| Reverse                | GACTTCGAGAACGAGATGG   |
| <b><i>MYH</i></b>      |                       |
| Forward                | CTGGCTGGCTGGACAAGAA   |
| Reverse                | TGAAGAGAGCAGACACGGTC  |
| <b><i>Vimentin</i></b> |                       |
| Forward                | GACAGGATGTTGACAATGC   |
| Reverse                | GTCGATCTGGACATGCTGTT  |
| <b><i>VEGFA</i></b>    |                       |
| Forward                | TGCTGTAGGAAGCTCATCTC  |
| Reverse                | GGCTGCTGCAATGATGAAAG  |
| <b><i>Ki67</i></b>     |                       |
| Forward                | AAGGACTGGAAATAGCAGAGG |
| Reverse                | GGATGTGATGGCTGATGAA   |
| <b><i>GAPDH</i></b>    |                       |
| Forward                | CTAGAGCAACAGGGTGGTGG  |
| Reverse                | AGCGTGGTGGGACTGAGTGG  |

ACTA1: Actin, alpha 1, skeletal muscle; GAPDH: Glyceraldehyde-3-phosphate dehydrogenase;  
 MYH: Myosin heavy chain ; VEGFA: Vascular endothelial growth factor A

**A**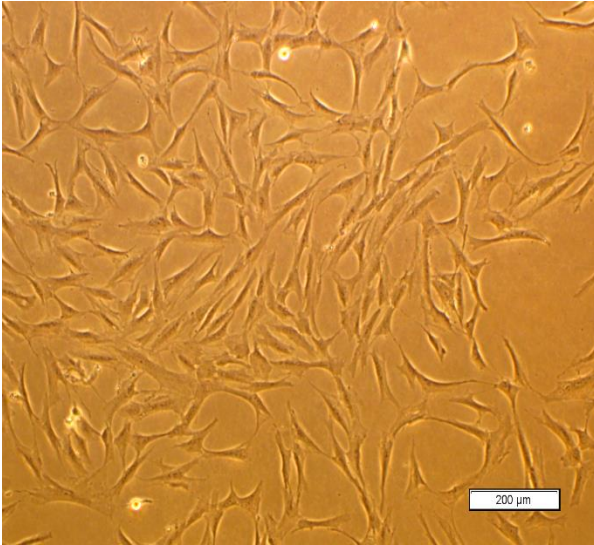**B**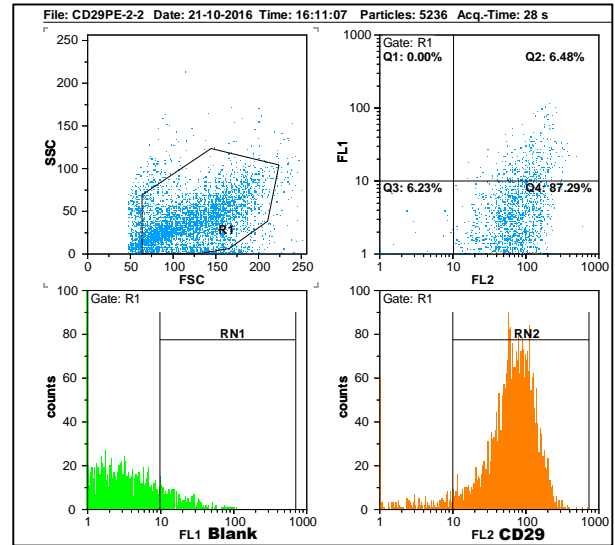**C**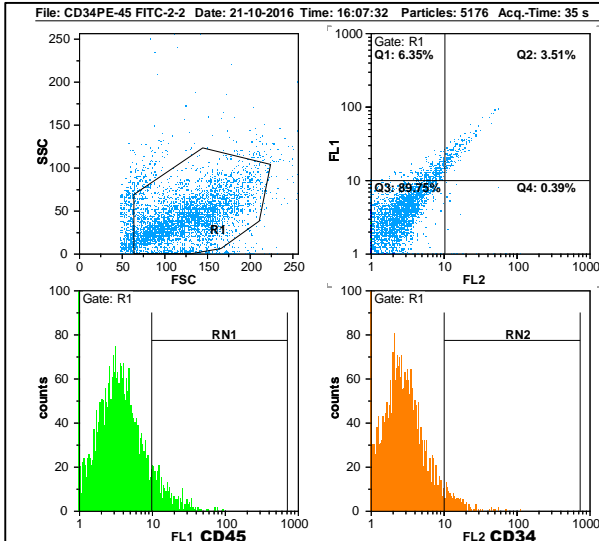**D**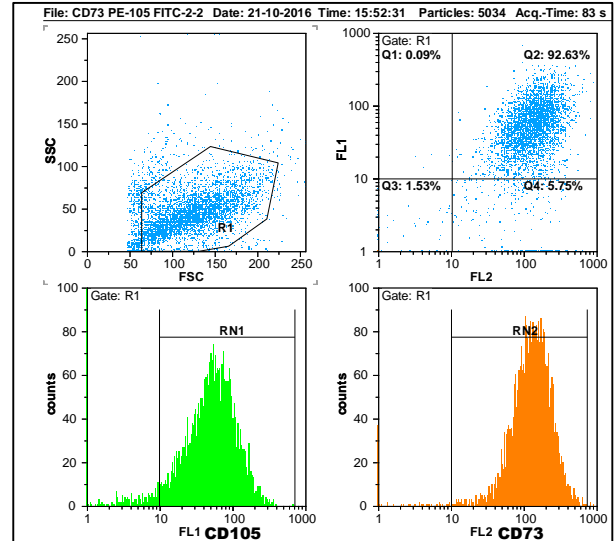

Supplement figure 1: Flow cytometry of hADSCs. Morphology (fifth passage) (A) and cell surface markers (B-D) use for characterization of hADSCs (CD29<sup>+</sup>, CD73<sup>+</sup>, CD105<sup>+</sup>, CD34<sup>-</sup>, and CD45<sup>-</sup>).
